# Supplementary material
Source: PubMed Central journal article supplement (PMC8026731)
Supplement: NIHMS1671980-supplement-1.pdf [file NIHMS1671980-supplement-1.pdf]

## Supplemental Figure 1

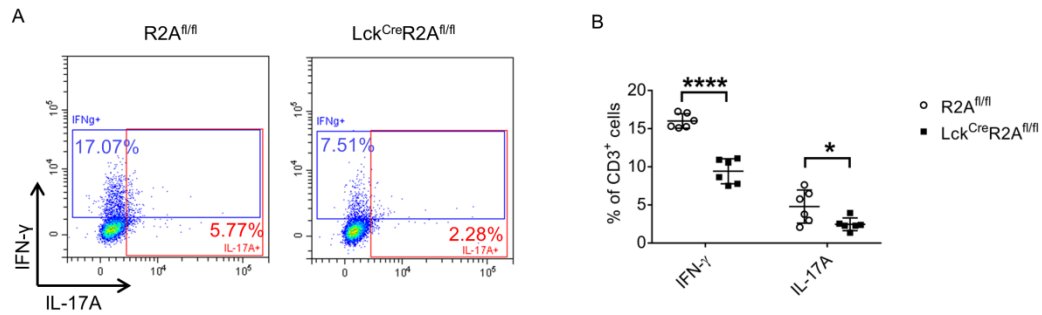

**Supplemental Figure 1 PPP2R2A deficiency in T cells decreases IFN- $\gamma$ - and IL-17A-positive T cells in splenocytes.** Splenocytes isolated from R2A<sup>fl/fl</sup> or Lck<sup>Cre</sup>R2A<sup>fl/fl</sup> mice were stimulated using PMA/ionomycin for 4 hours before FACS analysis. **(A)** Representative flow cytometry plots are shown. **(B)** Cumulative data ( $n = 6$  mice/group) depicting proliferation the percentages of IFN- $\gamma$ - and IL-17-positive cells. \* $P < 0.05$  and \*\*\*\* $P < 0.0001$  by unpaired  $T$  test. The data were obtained from three independent experiments.

## Supplemental Figure 2

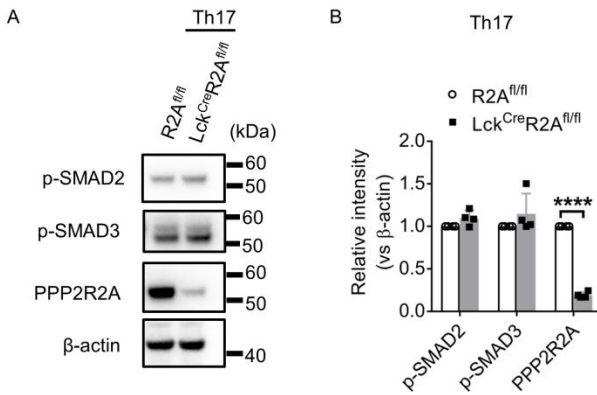

**Supplemental Figure 2 PPP2R2A deficiency does not alter the phosphorylation status of SMAD2 and SMAD3.** R2A<sup>fl/fl</sup> and Lck<sup>Cre</sup>R2A<sup>fl/fl</sup> naive CD4<sup>+</sup> T cells were cultured under Th17-polarizing condition for 3 days *in vitro* before analysis. Protein lysates were prepared for western blot analysis using the indicated antibodies. (A) immunoblot; (B) cumulative data (n=4 mice/group). The data were obtained from two independent experiments.

**Supplemental Table 1 Antibodies used for FACS.**

| <b>Antibody-Conjugate</b>    | <b>Company (clone)</b>   | <b>Dilution</b> |
|------------------------------|--------------------------|-----------------|
| <b>Figure 3</b>              |                          |                 |
| CD3-PE/Cy7                   | BioLegend (17A2)         | 1:100           |
| CD4-Percp/Cy5.5              | BioLegend (GK1.5)        | 1:100           |
| CD8-APC/Cy7                  | BD Pharmingen (53-6.7)   | 1:100           |
|                              |                          |                 |
| <b>Figure 4B</b>             |                          |                 |
| CD4-PE/Cy7                   | BioLegend (RM4-5)        | 1:100           |
| IFN- $\gamma$ -Bv421 (Th1)   | BioLegend (XMG1.2)       | 1:50            |
| IL-17A-PE (Th17)             | BioLegend (TC11-18H10.1) | 1:50            |
| or Foxp3-PE (Treg)           | eBioscience (FJK-16s)    | 1:50            |
|                              |                          |                 |
| <b>Figure 6</b>              |                          |                 |
| CD45-APC                     | BioLegend (30-F11)       | 1:100           |
| CD4-PercpFloor 710           | Invitrogen (SK3)         | 1:100           |
| CD8-FITC                     | BioLegend (53-6.7)       | 1:100           |
| Thy1.2-PE/Cy7                | BioLegend (53-2.1)       | 1:100           |
| IL-17A-PE                    | BioLegend (TC11-18H10.1) | 1:50            |
| IFN- $\gamma$ -Bv421         | BioLegend (XMG1.2)       | 1:50            |
|                              |                          |                 |
| <b>Supplemental Figure 1</b> |                          |                 |
| CD3-PE/Cy7                   | BioLegend (17A2)         | 1:100           |
| IFN- $\gamma$ -Bv421 (Th1)   | BioLegend (XMG1.2)       | 1:50            |
| IL-17A-PE (Th17)             | BioLegend (TC11-18H10.1) | 1:50            |
|                              |                          |                 |
